# Supplementary material
Source: Springer Nature journal article supplement (https://www.springermedizin.de/resource/supplementary/13048_2010_47_MOESM2_ESM.pdf/9664780)

(a)

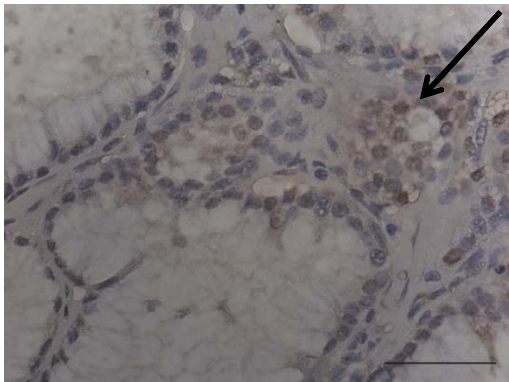

(b)

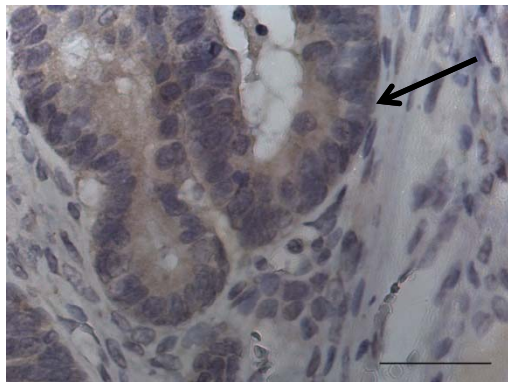

(c)

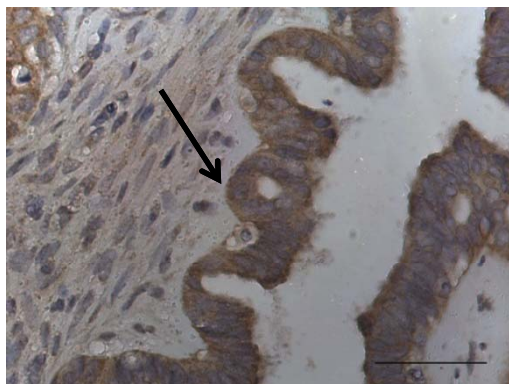

(d)

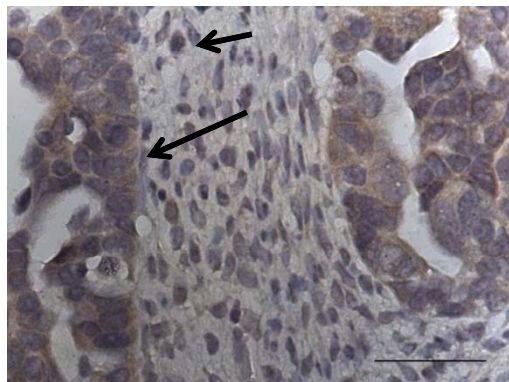

(e)

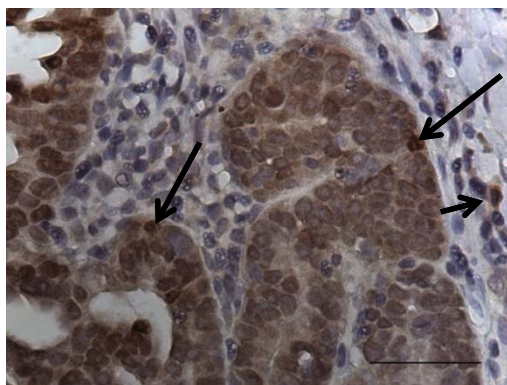

Supplement: MOESM2 [file 9664780]
